# Supplementary material
Source: publisher figshare collection journal article supplement (https://sage.figshare.com/ndownloader/files/24129772)
Supplement: Supplementary file 1 [file 24129772]

What elements of a systems approach to bereavement are most effective at the time of sudden events causing rapid deaths at population levels? Lessons for COVID-19.

Database: Ovid MEDLINE(R) ALL <1946 to April 03, 2020>

Search Strategy:

--------------------------------------------------------------------------------

1. bereavement/

2. grief/

3. (bereave* or grief or griev* or mourn*).tw.

4. (sorrow* or sadness).tw.

5. widowhood/

6. widow*.tw.

7. or/1-6

8. bereaved person*.mp.

9. ((bereave* or grief stricken or griev* or mourn*) adj5 (person* or people or adult* or parent* or women or men or adolescen* or teenage* or Mother or Father or Mum or Dad or family or families)).mp.

10. bereaved famil*.mp.

11. or/8-10

12. 7 or 11

13. exp Influenza, Human/

14. *"Disease Outbreaks"/

15. Natural Disasters/

16. Disasters/

17. September 11 Terrorist Attacks/

18. Terrorism/

19. Mass Casualty Incidents/

20. Bombs/

21. Explosions/

22. ebola.mp.

23. bomb attack*.mp.

24. SARS Virus/

25. Severe Acute Respiratory Syndrome/

26. Coronavirus Infections/

27. Influenza A Virus, H1N1 Subtype/

28. Influenza A virus/

29. Influenza A Virus, H5N1 Subtype/

30. (Bird flu or avian flu).tw.

31. Tsunamis/

32. terror* attack*.tw.

33. exp Earthquakes/

34. (avalanche* or landslide* or flood or earthquake*).tw.

35. exp Pandemics/

36. exp Epidemics/

37. Wildfires/

38. Tornadoes/

39. *"Cyclonic Storms"/

40. Mass Casualty Incident*.tw.

41. Accidents, Aviation/

42. "Wounds, Gunshot"/

43. (War or wars or warring or Terroris* or Genocide or Civil Disorder* or volcanic eruption* or Disaster*OR Earthquake* or Cyclonic Storm* or Tornado* or Flood* or Tidal Wave* or cyclone* or typhoon* or hurricane* or tropical storm* or tsunami* or landslide*).tw.

44. (infectious disease* or pandemic* or epidemic*).tw.

45. or/13-44

46. 12 and 45

47. limit 46 to (english language and yr="2000 -Current")
